# Supplementary material
Source: PubMed Central journal article supplement (PMC3295257)
Supplement: 1200742109_pnas.201200742SI.pdf [file 1200742109_pnas.201200742SI.pdf]

**Measurement.** After rapid decapitation, the hippocampus was dissected and placed in precooled tubes and frozen in liquid nitrogen within 3 min of decapitation. Tissue samples were stored at  $-80^{\circ}\text{C}$  until extraction. For detection of endocannabinoids, the collected hippocampal tissue was weighed and homogenized in 2-mL polypropylene tubes (Sarstedt). For lipid extraction, internal standards consisting of the stable isotope-labeled endocannabinoids arachidonyl ethanolamide-d<sub>4</sub>, 2-arachidonoyl glycerol-d<sub>5</sub>, palmitoyl ethanolamide-d<sub>4</sub>,

N-arachidonoyl dopamine-d8, and arachidonoyl glycine-d8 (synthesized by Roche Diagnostics, and Cayman) were added to the tubes. The purity of these materials was >97.2%. Then, 1 mL methyl tertiary butyl ether (Sigma-Aldrich) was added, and the mixture was vortexed for 30 s and centrifuged at  $12,000 \times g$  for 6 min. The clear supernatant was transferred into clean 2-mL polypropylene tubes (Sarstedt) and evaporated under N<sub>2</sub> at 37 °C. Dried organic phases were then reconstituted in 100  $\mu$ L acetonitrile, vortexed for 30 s, and centrifuged at  $12,000 \times g$  for 6 min; endocannabinoid levels were determined with HPLC and tandem MS.

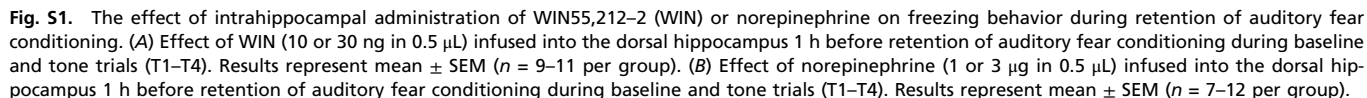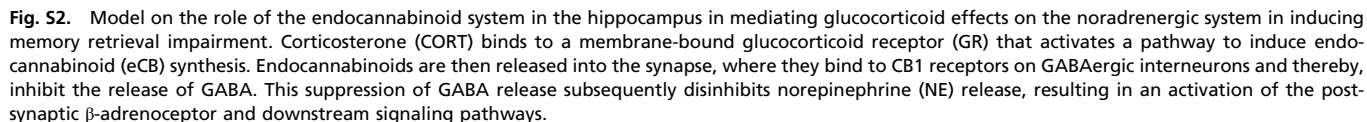

**Table S1. Percentage freezing during training of contextual fear conditioning in animals later administered corticosterone**

**Table S5. Percentage freezing during training of contextual fear conditioning in animals later administered norepinephrine and AM251**

| Drug groups | Shock trials |        |         |         |         |
|-------------|--------------|--------|---------|---------|---------|
|             | 1            | 2      | 3       | 4       | 5       |
| Vehicle     |              |        |         |         |         |
| Vehicle     | 26 ± 7       | 37 ± 8 | 50 ± 9  | 57 ± 7  | 66 ± 6  |
| NE (1 µg)   | 19 ± 8       | 32 ± 9 | 43 ± 12 | 53 ± 9  | 61 ± 9  |
| NE (3 µg)   | 20 ± 6       | 32 ± 9 | 44 ± 10 | 59 ± 7  | 66 ± 9  |
| AM251       |              |        |         |         |         |
| Vehicle     | 29 ± 8       | 45 ± 8 | 60 ± 9  | 63 ± 7  | 54 ± 9  |
| NE (1 µg)   | 32 ± 7       | 48 ± 7 | 53 ± 6  | 58 ± 6  | 52 ± 8  |
| NE (3 µg)   | 19 ± 5       | 31 ± 8 | 38 ± 9  | 50 ± 10 | 49 ± 10 |

There was no difference in the acquisition rate between later drug groups. Values are expressed as mean ± SEM ( $n = 11\text{--}15$  per group). NE, norepinephrine.
